# Supplementary material for: Experimental and theoretical studies on the NLO properties of two quaternary non-centrosymmetric chalcogenides: BaAg2GeS4and BaAg2SnS4
Source: Royal Society of Chemistry journal article supplement (doi:10.1039/c7dt04178k), 2017-11-27
Supplement: c7dt04178k1.pdf [file c7dt04178k1.pdf]

## Electronic Supplementary Information

### Two quaternary non-centrosymmetric chalcogenides BaAg<sub>2</sub>GeS<sub>4</sub> and BaAg<sub>2</sub>SnS<sub>4</sub>: experimental and theoretical studies on the NLO properties

Hong Chen,<sup>a</sup> Pei-Fei Liu,<sup>b,c</sup> Bing-Xuan Li,<sup>d</sup> Hua Lin,<sup>\*,a</sup> Li-Ming Wu<sup>\*,a,c</sup> and Xin-Tao Wu<sup>a</sup>

<sup>a</sup> State Key Laboratory of Structural Chemistry, Fujian Institute of Research on the Structure of Matter, Chinese Academy of Sciences, Fuzhou, Fujian 350002, People's Republic of China.

<sup>b</sup> Institute of High Energy Physics, Chinese Academy of Sciences (CAS), Beijing 100049, China.

<sup>c</sup> Dongguan Neutron Science Center, Dongguan 523803, China.

<sup>d</sup> Key Laboratory of Optoelectronic Materials Chemistry and Physics, Fujian Institute of Research on the Structure of Matter, Chinese Academy of Sciences, Fuzhou, Fujian 350002, People's Republic of China

<sup>e</sup> Key Laboratory of Theoretical and Computational Photochemistry, Ministry of Education, College of Chemistry, Beijing Normal University, Beijing 100875, People's Republic of China

\*E-mail: linhua@fjirsm.ac.cn and liming\_wu@fjirsm.ac.cn.

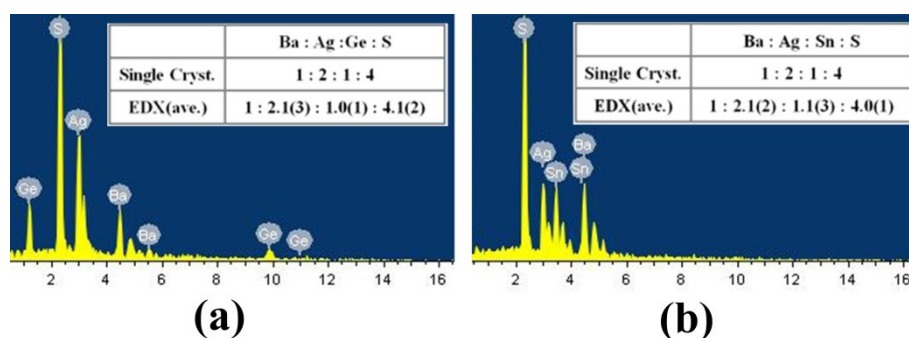

Figure S1 EDX result of (a) BaAg<sub>2</sub>GeS<sub>4</sub> (1) and (b) BaAg<sub>2</sub>SnS<sub>4</sub> (2).

## Electronic Supplementary Information

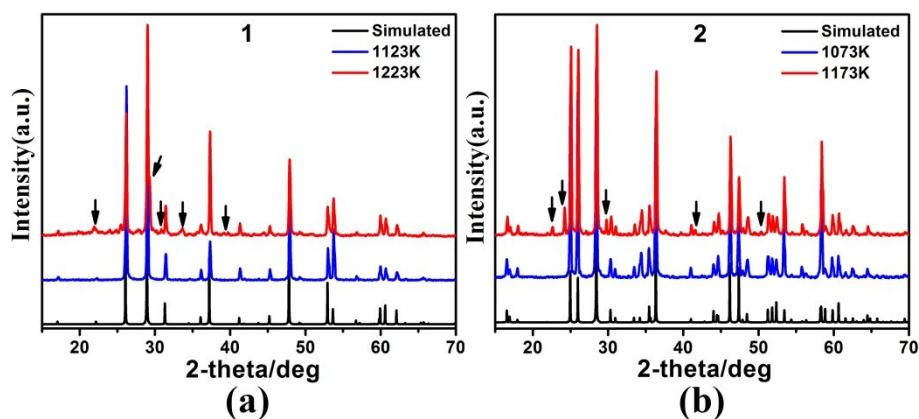

**Figure S2** The PXR D patterns of sample of (a) BaAg<sub>2</sub>GeS<sub>4</sub> (1) and (b) BaAg<sub>2</sub>SnS<sub>4</sub> (2) heated at various temperatures (blue and red) and the simulated one (black). For 1, the sample heated at 1123K was still single phased but decomposed at 1223K. For 2, the sample heated at 1073K was still single phased but decomposed at 1173K. Arrows indicate the decomposed products.

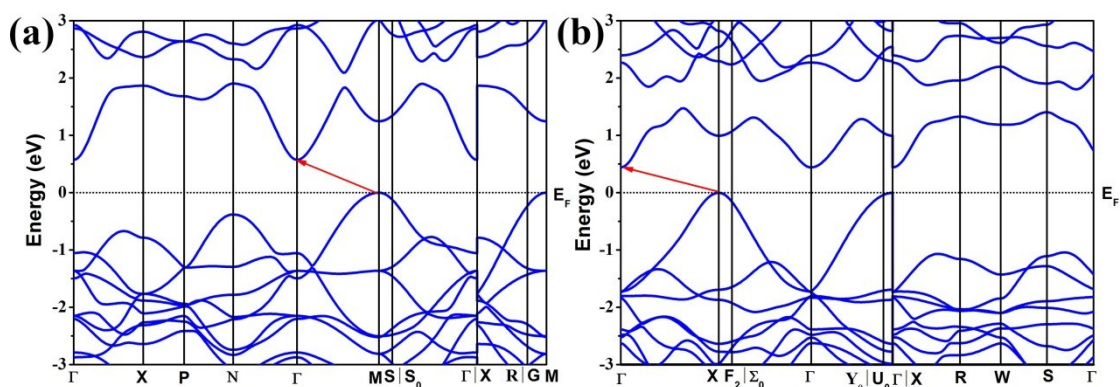

**Figure S3** Calculated band structure of (a) BaAg<sub>2</sub>GeS<sub>4</sub> (1) and (b) BaAg<sub>2</sub>SnS<sub>4</sub> (2), the Fermi level is set at 0.0 eV.

### Electronic Supplementary Information

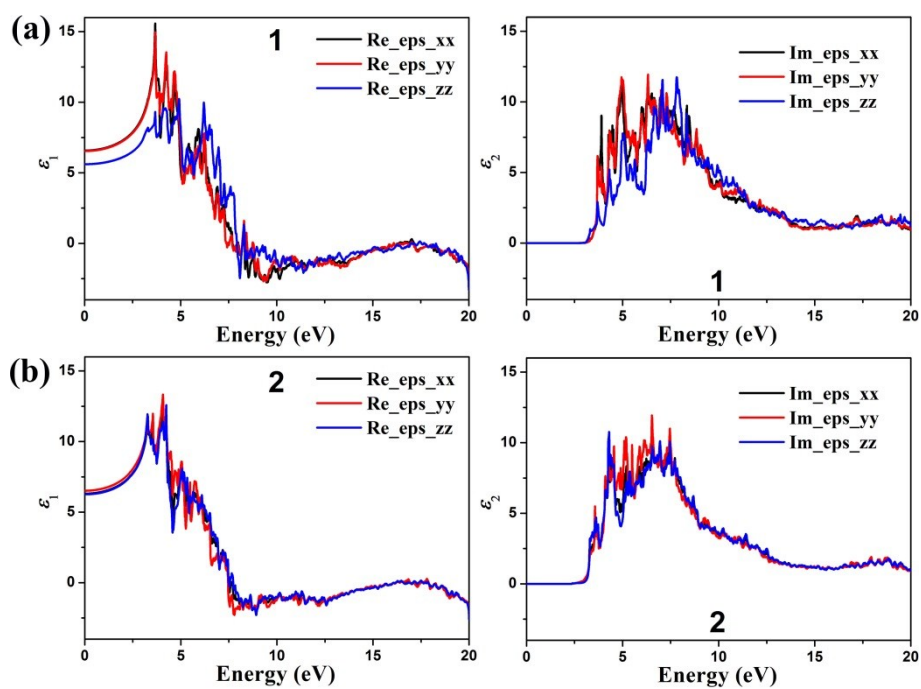

**Figure S4.** Energy dependences of the real part ( $\epsilon_1$ ) and imaginary part ( $\epsilon_2$ ) of (a) BaAg<sub>2</sub>GeS<sub>4</sub> (1) and (b) BaAg<sub>2</sub>SnS<sub>4</sub> (2).

## Electronic Supplementary Information

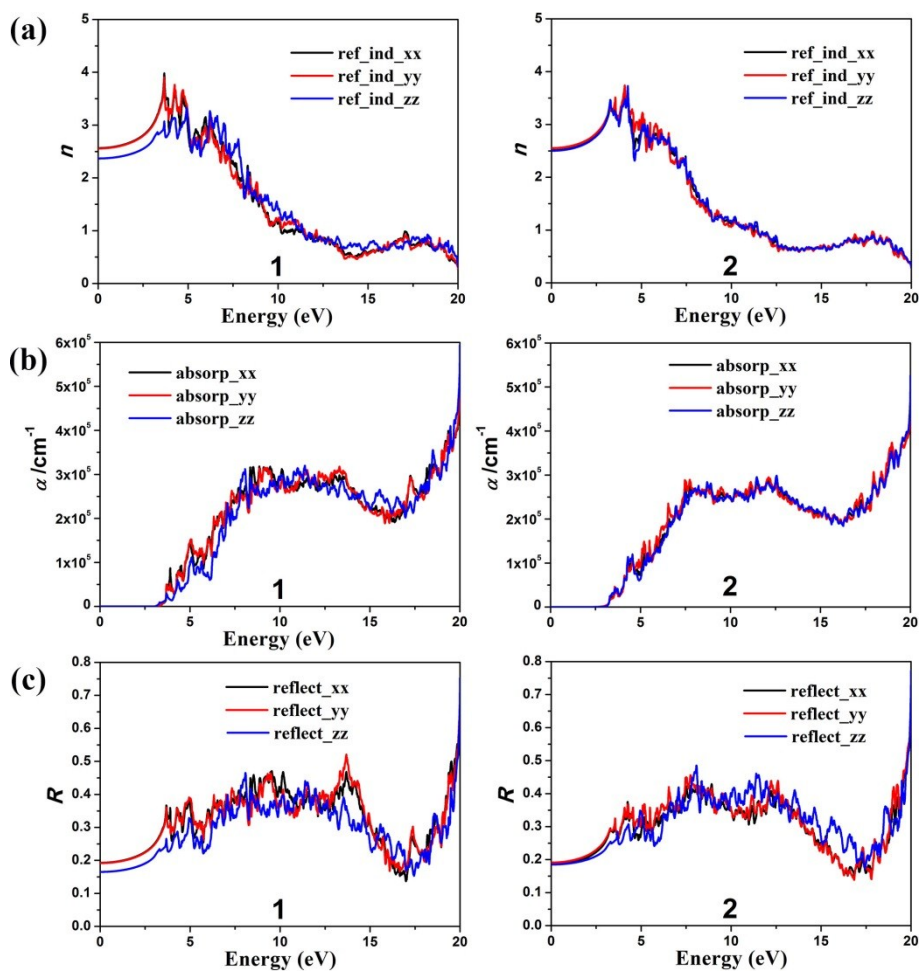

**Figure S5.** The calculated (a) refractive index ( $n$ ), (b) absorption coefficient ( $\alpha$ ) and (c) reflectivity ( $R$ ) of BaAg<sub>2</sub>GeS<sub>4</sub> (1) and BaAg<sub>2</sub>SnS<sub>4</sub> (2).

## Electronic Supplementary Information

**Table S1.** Atomic coordinates and equivalent isotropic displacement parameters of BaAg<sub>2</sub>GeS<sub>4</sub> and BaAg<sub>2</sub>SnS<sub>4</sub>.

| Atom                               | <i>Wyckoff</i> | <i>x</i>  | <i>y</i>  | <i>z</i>  | $U_{(eq)}$ * |
|------------------------------------|----------------|-----------|-----------|-----------|--------------|
| BaAg <sub>2</sub> GeS <sub>4</sub> |                |           |           |           |              |
| Ba                                 | <i>2b</i>      | 0         | 0         | 0.5       | 0.0152(7)    |
| Ag                                 | <i>4d</i>      | 0         | 0.5       | 0.75      | 0.0406(8)    |
| Ge                                 | <i>2a</i>      | 0         | 0         | 0         | 0.0112(7)    |
| S                                  | <i>8i</i>      | 0.1889(4) | 0.1889(4) | 0.1560(4) | 0.0157(2)    |
| BaAg <sub>2</sub> SnS <sub>4</sub> |                |           |           |           |              |
| Ba                                 | <i>2a</i>      | 0         | 0         | 0         | 0.0165(6)    |
| Ag                                 | <i>4j</i>      | 0         | 0.5       | 0.2052(3) | 0.0342(7)    |
| Ge                                 | <i>2c</i>      | 0         | 0         | 0.5       | 0.0124(6)    |
| S                                  | <i>8k</i>      | 0.2980(7) | 0.3064(7) | 0.8320(6) | 0.0172(2)    |

\* $U_{(eq)}$  is defined as one-third of the trace of the orthogonalized  $U_{ij}$  tensor.

**Table S2.** Selected Bond Lengths (Å) of BaAg<sub>2</sub>GeS<sub>4</sub> and BaAg<sub>2</sub>SnS<sub>4</sub>.

|      | BaAg <sub>2</sub> GeS <sub>4</sub> |      | BaAg <sub>2</sub> SnS <sub>4</sub> |
|------|------------------------------------|------|------------------------------------|
| Ag–S | 2.594(3)                           | Ag–S | 2.491(5)                           |
| Ag–S | 2.594(3)                           | Ag–S | 2.491(5)                           |
| Ag–S | 2.594(3)                           | Ag–S | 2.786(5)                           |
| Ag–S | 2.594(3)                           | Ag–S | 2.786(5)                           |
| Ge–S | 2.210(4)                           | Sn–S | 2.388(5)                           |
| Ge–S | 2.210(4)                           | Sn–S | 2.388(5)                           |
| Ge–S | 2.210(4)                           | Sn–S | 2.388(5)                           |
| Ge–S | 2.210(4)                           | Sn–S | 2.388(5)                           |
| Ba–S | 3.251(5)                           | Ba–S | 3.292(6)                           |
| Ba–S | 3.251(5)                           | Ba–S | 3.292(6)                           |
| Ba–S | 3.251(5)                           | Ba–S | 3.292(6)                           |
| Ba–S | 3.251(5)                           | Ba–S | 3.292(6)                           |
| Ba–S | 3.307(6)                           | Ba–S | 3.337(6)                           |
| Ba–S | 3.307(6)                           | Ba–S | 3.337(6)                           |
| Ba–S | 3.307(6)                           | Ba–S | 3.337(6)                           |
| Ba–S | 3.307(6)                           | Ba–S | 3.337(6)                           |
